# Supplementary material for: Rapid screening of cellular stress responses in recombinant Pichia pastoris strains using metabolite profiling
Source: PubMed Central journal article supplement (PMC5329079; doi:10.1007/s10295-017-1904-5), 2017-02-03
Supplement: 10295_2017_1904_MOESM1_ESM.pdf [file 10295_2017_1904_MOESM1_ESM.pdf]

## Supplementary figures

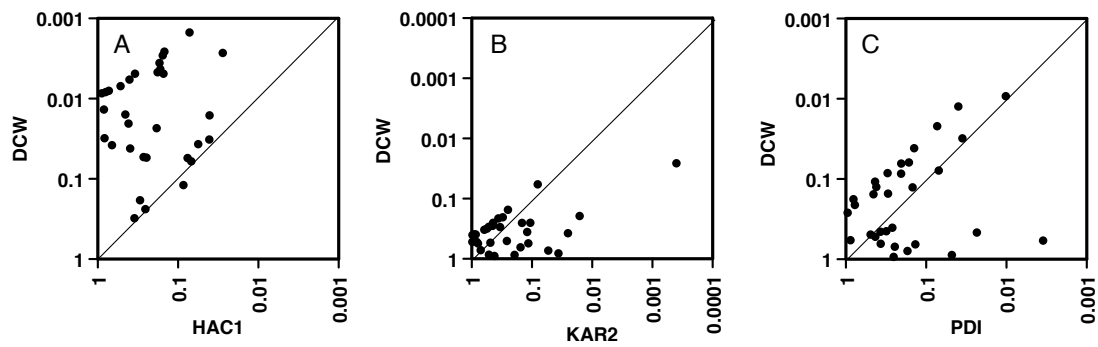

**Figure S1.** Comparison of relative importance of DCW or gene expression as calculated by partial correlation across all metabolites. Points falling in the upper left half (above the line  $x=y$ ) represent metabolites more influenced by DCW than gene expression, and points falling in the lower right half are more influenced by gene expression than DCW. A: *HAC1*; B: *KAR2*; C: *PDI1*.

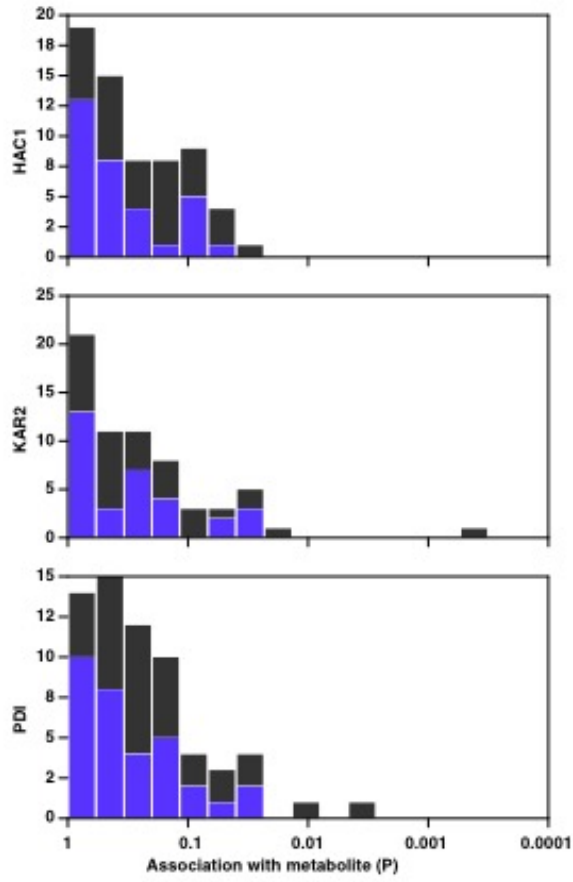

**Figure S2.** Associations between gene expression and metabolite levels are higher for extracted (black) than supernatant (blue) metabolites.

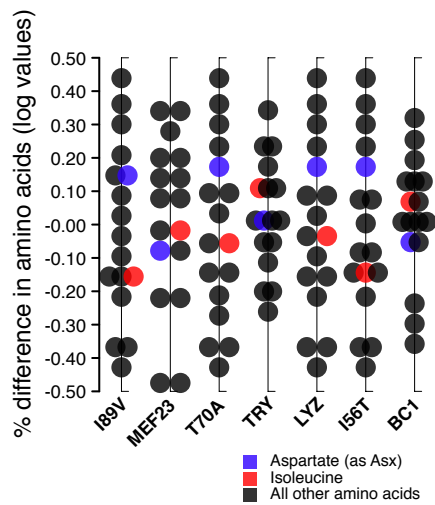

**Figure S3.** Aspartate (blue dots, as Asx) and isoleucine (red dots) are not unusually discongruent to the amino acid composition of *Pichia pastoris* when compared across all amino acids. (Glu and Gln represented as Glx; Trp was the most outlying amino acid for all recombinant proteins, and is omitted here for clearer plotting.)
